# Supplementary material
Source: publisher figshare collection journal article supplement (https://gsapubs.figshare.com/ndownloader/files/39510955)
Supplement: Supplementary file 1 [file 39510955]

## Sheet: Supplementary table S3
Rock Creek West					Wood Mountain Creek					Average of Rock Creek West and Wood Mountain Creek
Tiepoint	Height relative to K-Pg Boundary (cm)	Minimum duration (0 kyr/m)	Most likely duration (40 kyr/m)	Maximum duration (175 kyr/m)	Tiepoint	Height relative to K-Pg Boundary (cm)	Minimum duration (0 kyr/m)	Most likely duration (40 kyr/m)	Maximum duration (175 kyr/m)	Tiepoint	Minimum duration (0 kyr/m)	Most likely duration (40 kyr/m)	Maximum duration (175 kyr/m)
9	-	-	-	-	9	60.25	0	24.1	105.438	9	0	29.85	130.594
8	78.5	0	31.4	137.375	8	49.75	0	19.9	87.0625	8	0	25.65	112.219
7	66.5	0	26.6	116.375	7	44	0	17.6	77	7	0	22.1	96.6875
6	61.75	0	24.7	108.062	6	41	0	16.4	71.75	6	0	20.55	89.9062
5	44.25	0	17.7	77.4375	5	32.75	0	13.1	57.3125	5	0	15.4	67.375
4	34.25	0	13.7	59.9375	4	28.25	0	11.3	49.4375	4	0	12.5	54.6875
3	23	0	9.2	40.25	3	18.5	0	7.4	32.375	3	0	8.3	36.3125
2	14.25	0	5.7	24.9375	2	11.5	0	4.6	20.125	2	0	5.15	22.5312
1	2	0	0.8	3.5	1	1.75	0	0.7	3.0625	1	0	0.75	3.28125
0	0.5	0	0.2	0.875	0	0.25	0	0.1	0.4375	0	0	0.15	0.65625
-1	-4	0	-1.6	-7	-1	-4.25	0	-1.7	-7.4375	-1	0	-1.65	-7.21875
-2	-	-	-	-	-2	-10.25	0	-4.1	-17.9375	-2	0	-4.05	-17.7188

## Sheet: G50588
O’Connor, L.K., et al., 2023, Steady decline in mean annual air temperatures in the first 30 k.y. after the Cretaceous-Paleogene boundary: Geology, https://doi.org/10.1130/G50588.1
